# Supplementary material
Source: PubMed Central journal article supplement (PMC4424957)
Supplement: supp_ddv073_ddv073supp.pdf [file supp_ddv073_ddv073supp.pdf]

## SUPPLEMENT

### Protein misfolding and the pathogenesis of *ABCA4*-associated retinal degenerations

Ning Zhang<sup>1,§</sup>, Yaroslav Tsybovsky<sup>1,§</sup>, Alexander V. Kolesnikov<sup>2</sup>, Malgorzata Rozanowska<sup>3</sup>, Malgorzata Swider<sup>4</sup>, Sharon B. Schwartz<sup>4</sup>, Edwin M. Stone<sup>5,6</sup>, Grazyna Palczewska<sup>7</sup>, Akiko Maeda<sup>3</sup>, Vladimir J. Kefalov<sup>2</sup>, Samuel G. Jacobson<sup>4</sup>, Artur V. Cideciyan<sup>4</sup>, and Krzysztof Palczewski<sup>1,\*</sup>

From the Departments of <sup>1</sup>Pharmacology and Cleveland Center for Membrane and Structural Biology; <sup>2</sup>Ophthalmology & Visual Sciences, Washington University School of Medicine, 660 S. Euclid Avenue, Campus Box 8096, Saint Louis, MO 63110, USA; <sup>3</sup>Ophthalmology, School of Medicine, Case Western Reserve University, 10900 Euclid Avenue, Cleveland, OH 44106, USA; <sup>4</sup>Scheie Eye Institute, Department of Ophthalmology, Perelman School of Medicine, University of Pennsylvania, Philadelphia, PA, USA; <sup>5</sup>Department of Ophthalmology, University of Iowa Carver College of Medicine, Iowa City, IA, USA; <sup>6</sup>Howard Hughes Medical Institute, Iowa City, IA, USA; and <sup>7</sup>Polgenix, Inc., 11000 Cedar Ave, Suite 260, Cleveland, OH 44106, USA

<sup>8</sup>**Correspondence to:** Krzysztof Palczewski, Ph.D., or Yaroslav Tsybovsky, Ph.D. Department of Pharmacology, School of Medicine, Case Western Reserve University, 10900 Euclid Avenue, Cleveland, Ohio 44160, USA. [Tel: +1-216-368-4631](tel:+1-216-368-4631); Fax: +1-216-368-1300. Email: [kxp65@case.edu](mailto:kxp65@case.edu) or [yxt76@case.edu](mailto:yxt76@case.edu).

### Figure S1

RNA-Seq identified 474 significantly differentially expressed genes between *Abca4*<sup>-/-</sup> and WT, 290 between *Abca4*<sup>PV/PV</sup> and WT, and 323 between *Abca4*<sup>-/-</sup> and *Abca4*<sup>PV/PV</sup> mouse retina samples. Also, RNA-Seq identified 430 significantly differentially expressed genes between *Abca4*<sup>-/-</sup> and WT, 354 between *Abca4*<sup>PV/PV</sup> and WT, and 347 between *Abca4*<sup>-/-</sup> and *Abca4*<sup>PV/PV</sup> RPE samples in total. A considerable number of genes were found significantly differentially expressed in one genotype *versus* the other two genotypes in both retinal and RPE samples. Fifty-eight genes in the retina samples and fifty-three genes in the RPE samples were significantly differentially expressed among all three genotypes. These statistics are based on all significant genes that RNA-Seq detected including those sparsely expressed (low FPKM genes).

### Figure S2

Genes with a two-fold or greater up- or down-regulation ( $\text{Log}_2 < -1$  or  $> 1$ ) that also exhibited considerable expression levels (FPKM > 10) in retina transcriptomes. RNA-Seq identified 31 significantly differentially expressed genes in *Abca4*<sup>-/-</sup> *versus* WT, 21 in *Abca4*<sup>PV/PV</sup> *versus* WT and 25 in *Abca4*<sup>-/-</sup> *versus* *Abca4*<sup>PV/PV</sup> RPE samples. Individual genes are listed on the *right*.

### Figure S3

Two-fold or greater up- or down-regulated genes ( $\text{Log}_2 < -1$  or  $> 1$ ) which also had considerable expression levels (FPKM > 10) in mouse RPE transcriptomes. RNA-Seq identified 28 significantly differentially expressed genes in knockout *versus* wild-type, 18 in dual knock-in *versus* wild-type and 6 in knockout *versus* dual knock-in RPE samples. Individual genes are listed on the *right*.

### Figure S4

Immunohistochemistry with GFAP labeling (*green*) reveals a similar pattern in 1-month-old (**A**) and 6-month-old (**B**) *Abca4*<sup>PV/PV</sup>, *Abca4*<sup>-/-</sup> and WT mouse retinas indicating that Müller cells are not activated in the absence or upon mutation of ABCA4 in the retina. This observation contrasts with the robust GFAP signals evident in the retina of a 3-month-old rhodopsin E150K mouse which served as a model for retinitis pigmentosa. DAPI was used to counter-stain nuclei. Scale bars: 40  $\mu$ m. ONL, outer nuclear layer; OPL, outer plexiform layer; INL, inner nuclear layer; IPL, inner plexiform layer; GCL, ganglion cell layer.

### **Figure S5**

Rod photo-response recovery kinetics after photo-bleaching determined from ERGs of anesthetized 1-month-old and 8-month-old *Abca4*<sup>PV/PV</sup>, *Abca4*<sup>-/-</sup> or WT mice. (**A**) Representative full-field scotopic ERG responses from 1-month-old mice at the light intensity of  $-0.286$  ( $\log \text{cd} \times \text{s} / \text{m}^2$ ) before and at various times after photo-bleaching. Scotopic ERG a-wave amplitude recovery after >90% bleaching of rod visual pigment was slightly but not statistically significantly delayed in *Abca4* mutant mice both at 1 (**B**) and 8 (**C**) months of age. The results are presented with standard errors.

Significant genes in the retina

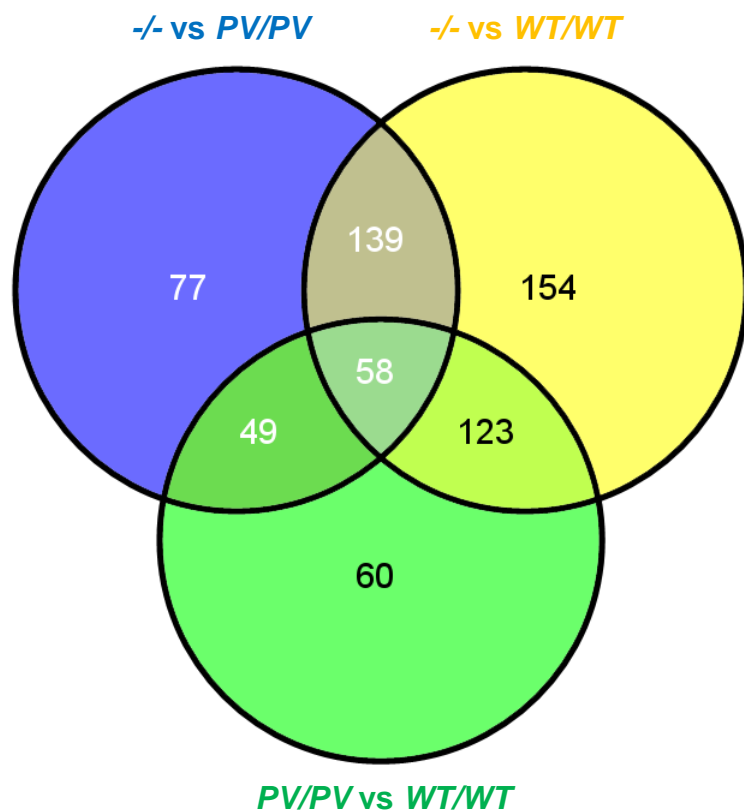

Significant genes in the RPE

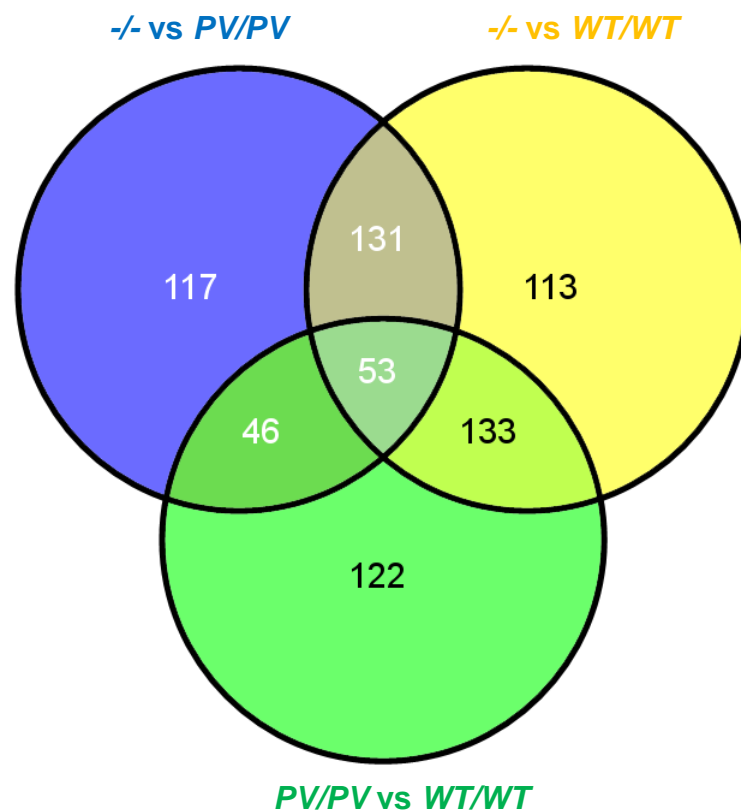

Figure S2

Significant genes in the retina  
(FPKM>10, Log2<-1 or >1)

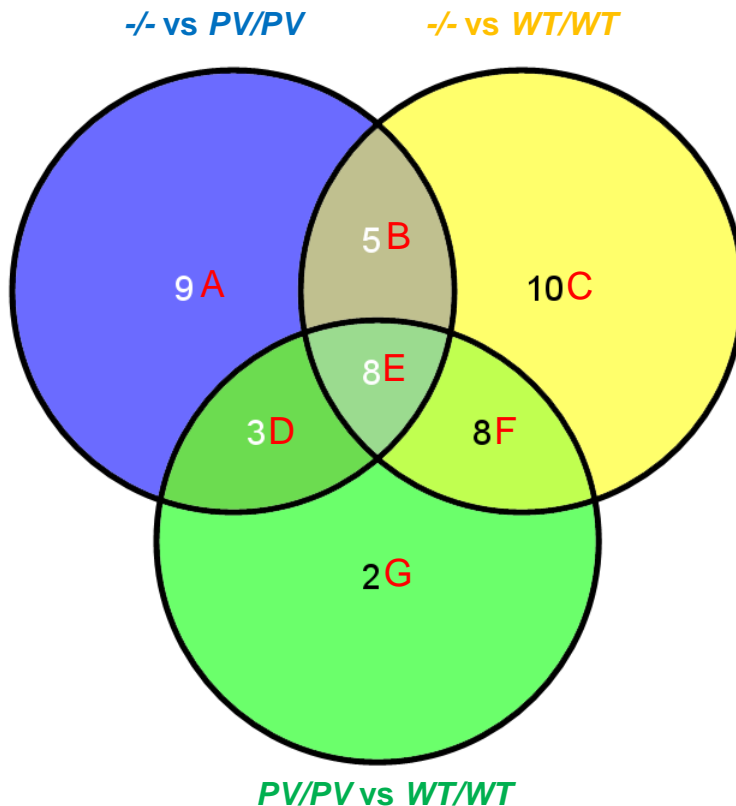

A: *Nupr1*, *Grifin*, *Crygn*, *Cd24a*, *Lim2*,  
*Ndufs5*, *Pop4*, *Mip*, *Glo1*

B: *Trf*, *Rnu12*, *Dusp1*, *Abca4*, *BC002163*

C: *Cryge*, *Fabp5*, *Gstm1*, *Dapl1*, *Rwdd4a*,  
*S100a6*, *Tuba1c*, *Beta-s*, *Gm16119*,  
*Fxyd6*

D: *Gpsm3*, *Gm1821*, *Ssbp4*

E: *Cryba1*, *Crygs*, *Crybb2*, *Cryba2*, *Cryab*,  
*Cryba4*, *Crybb1*, *Crybb3*

F: *Cryaa*, *Crygc*, *Ptgds*, *Crygb*, *Crygd*,  
*Cryga*, *Cd59a*, *Spc25*

G: *Xist*, *Gm5506*

Significant genes in the RPE  
(FPKM>10, Log2<-1 or >1)

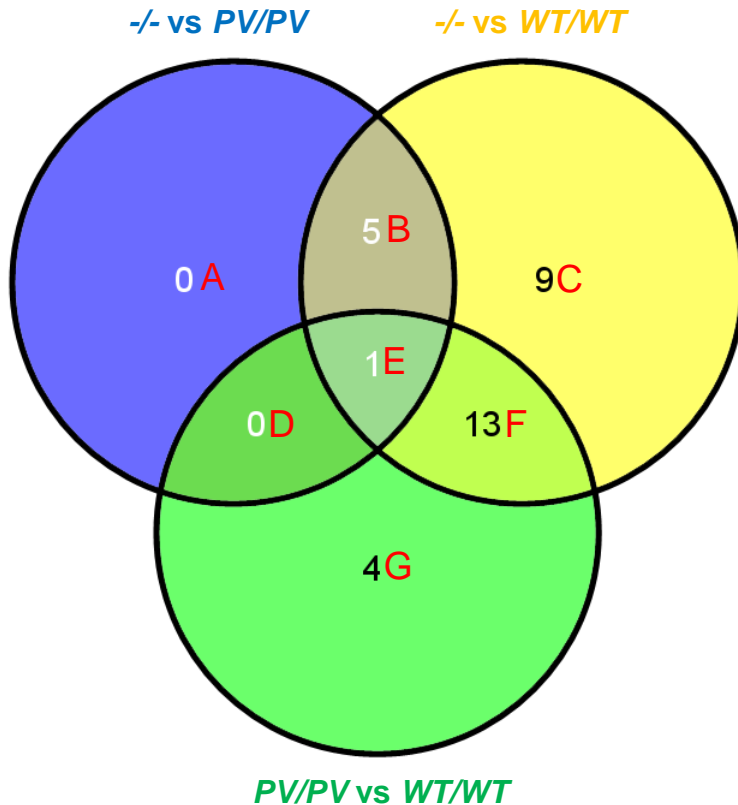

B: *Gpx3*, *Mrps12*, *Gpr180*, *Krt12*, *Retnla*

C: *Fkbp5*, *A130040M12Rik*, *Hbb-b2*,  
*4930583H14Rik*, *Crygc*, *Pde6a*, *Rpph1*,  
*Hist4h4*, *Pde6b*

E: *Gm1821*

F: *Sag*, *Cryba2*, *Cryba4*, *Crybb1*, *Gnat1*,  
*Crybb3*, *Pde6g*, *Rcvrn*, *Gngt1*, *Pdc*, *Nrl*,  
*Prph2*, *Rho*

G: *Mbp*, *Cryga*, *Crygs*, *Crygf*

Figure S4

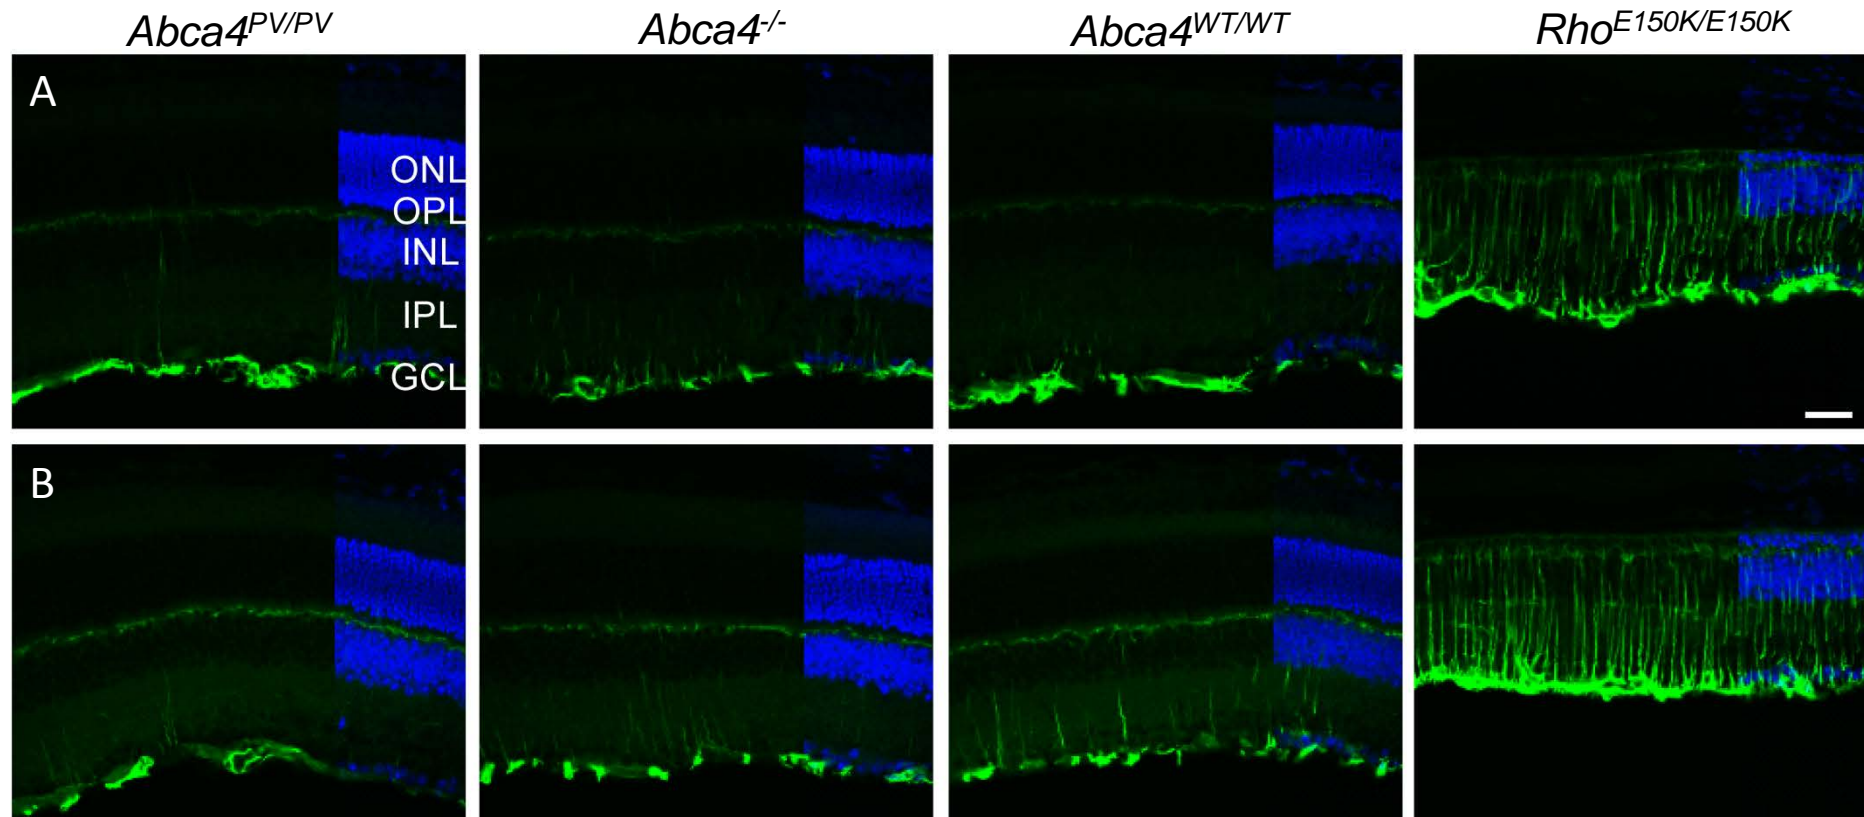

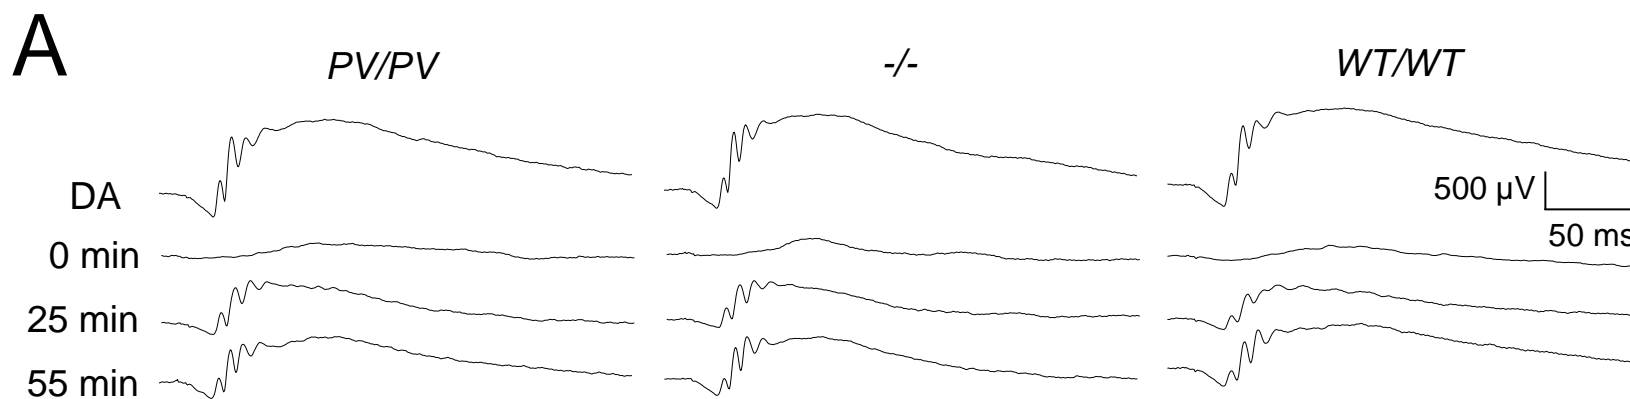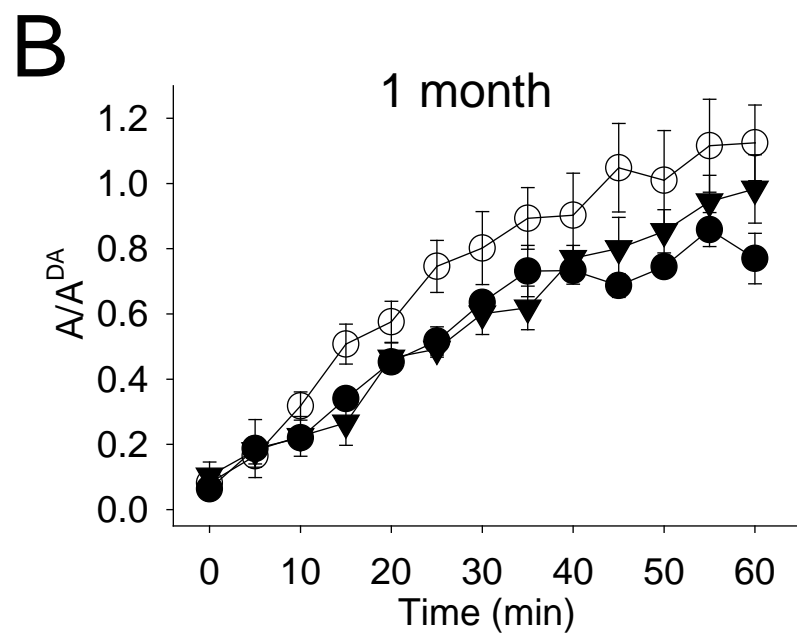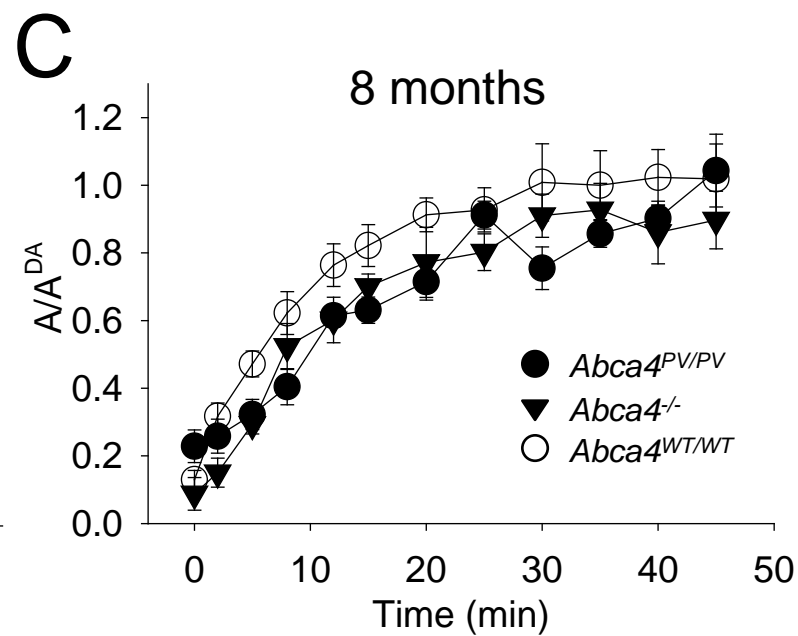



TABLE S1. Genes with altered expression in mouse retinas.

| Gene <sup>1</sup>    | Name                                                                           | FPKM         |                             |                               | Log2 fold change (q value)         |                                      |                                                               |
|----------------------|--------------------------------------------------------------------------------|--------------|-----------------------------|-------------------------------|------------------------------------|--------------------------------------|---------------------------------------------------------------|
|                      |                                                                                | WT           | <i>Abca4</i> <sup>-/-</sup> | <i>Abca4</i> <sup>PV/PV</sup> | <i>Abca4</i> <sup>-/-</sup> vs. WT | <i>Abca4</i> <sup>PV/PV</sup> vs. WT | <i>Abca4</i> <sup>PV/PV</sup> vs. <i>Abca4</i> <sup>-/-</sup> |
| <i>Nupr1</i>         | nuclear protein transcription regulator 1                                      | 5.46         | 66.91                       | <del>243.09</del> 243.09      | 3.61 (0.0029)                      | 2.15 (0.0029)                        | -1.46 (0.0029)                                                |
| <i>Grifin</i>        | galectin-related inter-fiber protein                                           | 1.16         | 29.40                       | 10.98                         | 4.66 (0.0029)                      | 3.24 (0.0029)                        | -1.42 (0.0029)                                                |
| <i>Crygn</i>         | crystallin, gamma N                                                            | 1.78         | 48.04                       | 17.96                         | 4.75 (0.0029)                      | 3.33 (0.0029)                        | -1.42 (0.0029)                                                |
| <i>Cd24a</i>         | CD24a antigen                                                                  | 9.41         | 66.16                       | 25.75                         | 2.81 (0.0029)                      | 1.45 (0.0029)                        | -1.36 (0.0029)                                                |
| <i>Lim2</i>          | lens intrinsic membrane protein 2                                              | 1.96         | 36.88                       | 15.45                         | 4.23 (0.0029)                      | 2.98 (0.0029)                        | -1.26 (0.0029)                                                |
| <i>Ndufs5</i>        | NADH dehydrogenase (ubiquinone) Fe-S protein 5                                 | 49.30        | 95.75                       | 43.90                         | 0.96 (0.0029)                      | -0.17 (0.9993)                       | -1.13 (0.0029)                                                |
| <i>Pop4</i>          | processing of precursor 4, ribonuclease P/MRP family, ( <i>S. cerevisiae</i> ) | 8.03         | 26.02                       | 12.05                         | 1.70 (0.0029)                      | 0.58 (0.0055)                        | -1.11 (0.0029)                                                |
| <i>Mip</i>           | major intrinsic protein of eye lens fiber                                      | 1.15         | 74.06                       | 35.05                         | 6.01 (0.0029)                      | 4.93 (0.0029)                        | -1.08 (0.0029)                                                |
| <i>Glo1</i>          | glyoxalase 1                                                                   | 258.24       | 342.00                      | 168.53                        | 0.41 (0.0762)                      | -0.61 (0.0029)                       | -1.02 (0.0029)                                                |
| <i>Trf</i>           | transferrin                                                                    | 19.55        | 45.49                       | 19.46                         | 1.22 (0.0029)                      | -1.22 (0.0029)                       | -0.006 (0.9993)                                               |
| <i>Rnu12</i>         | RNA U12, small nuclear                                                         | 191.62       | 70.86                       | 142.86                        | -1.44 (0.0029)                     | -0.42 (0.9310)                       | 1.01 (0.0478)                                                 |
| <i>Dusp1</i>         | dual specificity phosphatase 1                                                 | 30.47        | 14.07                       | 29.90                         | -1.11 (0.0029)                     | -0.027 (0.9310)                      | 1.088 (0.0029)                                                |
| <i>Abca4</i>         | ATP-binding cassette, sub-family A (ABC1), member 4                            | 253.68       | 78.66                       | 203.91                        | -1.69 (0.0029)                     | -0.32 (0.8862)                       | 1.374 (0.0029)                                                |
| <i>BC002163</i>      | cDNA sequence BC002163                                                         | 90.59        | 15.49                       | 88.62                         | -2.55 (0.0029)                     | -0.03 (0.9993)                       | 2.52 (0.0029)                                                 |
| <i>Cryge</i>         | crystallin, gamma E                                                            | 36.58        | 101.53                      | 62.36                         | 1.47 (0.0029)                      | 0.77 (0.0029)                        | -0.70 (0.0029)                                                |
| <i>Fabp5</i>         | fatty acid binding protein 5, epidermal                                        | 35.62        | 86.35                       | 54.30                         | 1.28 (0.0029)                      | 0.61 (0.0029)                        | -0.67 (0.0029)                                                |
| <i>Gstm1</i>         | glutathione S-transferase, mu 1                                                | 10.94        | 25.09                       | 15.39                         | 1.20 (0.0029)                      | 0.49 (0.0401)                        | -0.70 (0.0029)                                                |
| <i>Dapl1</i>         | death associated protein-like 1                                                | 31.96        | 69.47                       | 37.62                         | 1.12 (0.0029)                      | 0.24 (0.9425)                        | -0.88 (0.0029)                                                |
| <i>Rwdd4a</i>        | RWD domain containing 4A                                                       | 24.32        | 52.74                       | 41.51                         | 1.12 (0.0029)                      | 0.77 (0.0029)                        | -0.34 (0.0699)                                                |
| <i>S100a6</i>        | S100 calcium binding protein A6                                                | 11.32        | 22.80                       | 16.82                         | 1.01 (0.0029)                      | 0.57 (0.0852)                        | -0.44 (0.2426)                                                |
| <i>Tuba1c</i>        | tubulin, alpha 1C                                                              | 44.47        | 21.85                       | 43.23                         | -1.03 (0.0029)                     | -0.04 (0.9993)                       | 0.98 (0.0029)                                                 |
| <i>Beta-s</i>        | Hbb-bs, hemoglobin, beta adult s chain                                         | 81.52        | 37.89                       | 44.21                         | -1.11 (0.0029)                     | -0.88 (0.0029)                       | 0.22 (0.9717)                                                 |
| <i>Gm16119</i>       | predicted gene 16119                                                           | 53.63        | 21.87                       | 30.55                         | -1.29 (0.0029)                     | -0.81 (0.6681)                       | 0.48 (0.9993)                                                 |
| <i>Fxyd6</i>         | FXDYD domain-containing ion transport regulator 6                              | 34.71        | 12.97                       | 22.34                         | -1.42 (0.0029)                     | -0.64 (0.0029)                       | 0.78 (0.0029)                                                 |
| <i>Gpsm3</i>         | G-protein signalling modulator 3 (AGS3-like, <i>C. elegans</i> )               | 11.27        | 11.78                       | 23.90                         | 0.064 (0.9993)                     | 1.08 (0.0029)                        | 1.02 (0.0029)                                                 |
| <b><i>Gm1821</i></b> | <b>predicted gene 1821 (pseudo)</b>                                            | <b>29.23</b> | <b>46.72</b>                | <b>100.11</b>                 | <b>0.68 (0.0029)</b>               | <b>1.78 (0.0029)</b>                 | <b>1.10 (0.0029)</b>                                          |
| <i>Ssbp4</i>         | single stranded DNA binding protein 4                                          | 39.96        | 40.73                       | 89.08                         | 0.027 (0.9993)                     | 1.16 (0.0029)                        | 1.13 (0.0029)                                                 |

|                      |                                                                              |              |               |               |                      |                      |                       |
|----------------------|------------------------------------------------------------------------------|--------------|---------------|---------------|----------------------|----------------------|-----------------------|
| <i>Cryba1</i>        | crystallin, beta A1                                                          | 53.50        | 1547.41       | 494.22        | 4.85 (0.0029)        | 3.21 (0.0029)        | -1.65 (0.0029)        |
| <b><i>Crygs</i></b>  | <b>crystallin, gamma S</b>                                                   | <b>35.71</b> | <b>706.20</b> | <b>251.70</b> | <b>4.31 (0.0029)</b> | <b>2.82 (0.0029)</b> | <b>-1.49 (0.0029)</b> |
| <i>Crybb2</i>        | crystallin, beta B2                                                          | 57.60        | 1372.33       | 492.96        | 12.33 (0.0029)       | 9.76 (0.0029)        | -3.54 (0.0029)        |
| <b><i>Cryba2</i></b> | <b>crystallin, beta A2</b>                                                   | <b>24.04</b> | <b>614.04</b> | <b>229.78</b> | <b>4.67 (0.0029)</b> | <b>3.26 (0.0029)</b> | <b>-1.42 (0.0029)</b> |
| <i>Cryab</i>         | crystallin, alpha B                                                          | 39.98        | 644.73        | 254.07        | 4.01 (0.0029)        | 2.67 (0.0029)        | -1.34 (0.0029)        |
| <b><i>Cryba4</i></b> | <b>crystallin, beta A4</b>                                                   | <b>18.90</b> | <b>347.71</b> | <b>140.16</b> | <b>4.20 (0.0029)</b> | <b>2.89 (0.0029)</b> | <b>-1.31 (0.0029)</b> |
| <b><i>Crybb1</i></b> | <b>crystallin, beta B1</b>                                                   | <b>20.17</b> | <b>286.54</b> | <b>127.77</b> | <b>3.83 (0.0029)</b> | <b>2.66 (0.0029)</b> | <b>-1.17 (0.0029)</b> |
| <b><i>Crybb3</i></b> | <b>crystallin, beta B3</b>                                                   | <b>18.60</b> | <b>258.71</b> | <b>123.47</b> | <b>3.80 (0.0029)</b> | <b>2.73 (0.0029)</b> | <b>-1.07 (0.0029)</b> |
| <i>Cryaa</i>         | crystallin, alpha A                                                          | 82.14        | 2070.94       | 800.27        | 4.66 (0.0029)        | 3.28 (0.0029)        | -1.37 (0.0510)        |
| <b><i>Crygc</i></b>  | <b>crystallin, gamma C</b>                                                   | <b>52.93</b> | <b>221.52</b> | <b>126.98</b> | <b>2.07 (0.0029)</b> | <b>1.26 (0.0029)</b> | <b>-0.80 (0.0029)</b> |
| <i>Ptgds</i>         | prostaglandin D2 synthase (brain)                                            | 44.01        | 166.76        | 114.73        | 1.92 (0.0029)        | 1.38 (0.0029)        | -0.54 (0.0029)        |
| <i>Crygb</i>         | crystallin, gamma B                                                          | 50.16        | 185.44        | 109.44        | 1.89 (0.0029)        | 1.13 (0.0029)        | -0.76 (0.0029)        |
| <i>Crygd</i>         | crystallin, gamma D                                                          | 31.51        | 88.03         | 73.51         | 1.48 (0.0029)        | 1.22 (0.0029)        | -0.26 (0.6297)        |
| <i>Cryga</i>         | crystallin, gamma A                                                          | 10.61        | 25.71         | 23.02         | 1.28 (0.0029)        | 1.12 (0.0029)        | -0.16 (0.9993)        |
| <i>Cd59a</i>         | CD59a antigen                                                                | 35.25        | 12.52         | 15.64         | -1.49 (0.0029)       | -1.17 (0.0029)       | 0.32 (0.3230)         |
| <i>Spc25</i>         | SPC25, NDC80 kinetochore complex component, homolog ( <i>S. cerevisiae</i> ) | 156.92       | 36.90         | 63.40         | -2.09 (0.0029)       | -1.31 (0.0029)       | 0.78 (0.0029)         |
| <i>Xist</i>          | inactive X specific transcripts                                              | 23.77        | 37.92         | 63.74         | 0.67 (0.1631)        | 1.42 (0.0029)        | 0.75 (0.0055)         |
| <i>Gm5506</i>        | Eno1b, enolase 1B, retrotransposed                                           | 274.73       | 184.79        | 133.48        | -0.57 (0.0029)       | -1.04 (0.0029)       | -0.47 (0.0029)        |

<sup>1</sup>Genes shared by RPEs are shown in bold type.

TABLE S2. Genes with altered expression in mouse RPEs

| Gene <sup>1</sup>    | Name                                                                       | FPKM          |                             |                               | Log2 fold change (q value)         |                                      |                                                               |
|----------------------|----------------------------------------------------------------------------|---------------|-----------------------------|-------------------------------|------------------------------------|--------------------------------------|---------------------------------------------------------------|
|                      |                                                                            | WT            | <i>Abca4</i> <sup>-/-</sup> | <i>Abca4</i> <sup>PV/PV</sup> | <i>Abca4</i> <sup>-/-</sup> vs. WT | <i>Abca4</i> <sup>PV/PV</sup> vs. WT | <i>Abca4</i> <sup>PV/PV</sup> vs. <i>Abca4</i> <sup>-/-</sup> |
| <i>Gpx3</i>          | glutathione peroxidase 3                                                   | 128.76        | 279.12                      | 69.74                         | 1.12 (0.0035)                      | -0.88 (0.0035)                       | -2.00 (0.0035)                                                |
| <i>Mrps12</i>        | mitochondrial ribosomal protein S12                                        | 16.36         | 34.64                       | 13.99                         | 1.08 (0.0035)                      | -0.23 (0.9992)                       | -1.31 (0.0035)                                                |
| <i>Gpr180</i>        | G protein-coupled receptor 180                                             | 75.00         | 35.84                       | 72.78                         | -1.07 (0.0035)                     | -0.043 (0.9992)                      | 1.02 (0.0035)                                                 |
| <i>Krt12</i>         | keratin 12                                                                 | 181.18        | 68.02                       | 140.75                        | -1.41 (0.0035)                     | -0.36 (0.1499)                       | 1.05 (0.0035)                                                 |
| <i>Retnla</i>        | resistin like alpha                                                        | 46.93         | 20.10                       | 53.23                         | -1.22 (0.0035)                     | 0.18 (0.9992)                        | -1.40 (0.0035)                                                |
| <i>Fkbp5</i>         | FK506 binding protein 5                                                    | 10.50         | 23.12                       | 7.57                          | 1.14 (0.0035)                      | -0.47 (0.0460)                       | -1.61 (0.0035)                                                |
| <i>A130040M12Rik</i> | RIKEN cDNA A130040M12 gene                                                 | 32.30         | 64.96                       | 33.11                         | 1.01 (0.0035)                      | 0.04 (0.9992)                        | -0.97 (0.0035)                                                |
| <i>Hbb-b2</i>        | hemoglobin, beta adult minor chain                                         | 77.00         | 38.30                       | 4.33                          | -1.01 (0.0035)                     | -4.15 (0.0159)                       | -3.14 (0.0621)                                                |
| <i>4930583H14Rik</i> | Mgarp, mitochondria localized glutamic acid rich protein                   | 108.79        | 53.32                       | 59.82                         | -1.03 (0.0035)                     | -0.86 (0.0035)                       | 0.17 (0.9992)                                                 |
| <b><i>Crygc</i></b>  | <b>crystallin, gamma C</b>                                                 | <b>241.78</b> | <b>117.10</b>               | <b>126.52</b>                 | <b>-1.05 (0.0035)</b>              | <b>-0.93 (0.0035)</b>                | <b>0.11 (0.9992)</b>                                          |
| <i>Pde6a</i>         | phosphodiesterase 6A, cGMP-specific, rod, alpha                            | 21.43         | 10.22                       | 6.92                          | -1.07 (0.0035)                     | -1.63 (0.0035)                       | -0.56 (0.0035)                                                |
| <i>Rpph1</i>         | ribonuclease P RNA component H1                                            | 22103.7       | 10353.2                     | 15143.6                       | -1.09 (0.0035)                     | -0.55 (0.3913)                       | 0.55 (0.2282)                                                 |
| <i>Hist4h4</i>       | histone cluster 4, H4                                                      | 31.73         | 12.39                       | 17.25                         | -1.36 (0.0035)                     | -0.88 (0.0035)                       | 0.48 (0.0686)                                                 |
| <i>Pde6b</i>         | phosphodiesterase 6B, cGMP, rod receptor, beta polypeptide                 | 28.17         | 10.76                       | 7.56                          | -1.39 (0.0035)                     | -1.90 (0.0035)                       | -0.51 (0.0311)                                                |
| <b><i>Gm1821</i></b> | <b>predicted gene 1821</b>                                                 | <b>28.26</b>  | <b>13.29</b>                | <b>59.44</b>                  | <b>-1.09 (0.0035)</b>              | <b>1.07 (0.0035)</b>                 | <b>2.16 (0.0035)</b>                                          |
| <i>Sag</i>           | S-antigen, retina and pineal gland (arrestin)                              | 156.82        | 76.50                       | 39.66                         | -1.04 (0.0035)                     | -1.98 (0.0035)                       | -0.95 (0.0035)                                                |
| <b><i>Cryba2</i></b> | <b>crystallin, beta A2</b>                                                 | <b>90.18</b>  | <b>41.96</b>                | <b>44.99</b>                  | <b>-1.10 (0.0035)</b>              | <b>-1.00 (0.0035)</b>                | <b>0.10 (0.9992)</b>                                          |
| <b><i>Cryba4</i></b> | <b>crystallin, beta A4</b>                                                 | <b>95.24</b>  | <b>43.23</b>                | <b>45.13</b>                  | <b>-1.14 (0.0035)</b>              | <b>-1.08 (0.0035)</b>                | <b>0.06 (0.9992)</b>                                          |
| <b><i>Crybb1</i></b> | <b>crystallin, beta B1</b>                                                 | <b>91.94</b>  | <b>39.83</b>                | <b>42.99</b>                  | <b>-1.21 (0.0035)</b>              | <b>-1.10 (0.0035)</b>                | <b>0.11 (0.9992)</b>                                          |
| <b><i>Gnat1</i></b>  | <b>guanine nucleotide binding protein, alpha</b>                           | <b>160.68</b> | <b>68.52</b>                | <b>47.73</b>                  | <b>-1.23 (0.0035)</b>              | <b>-1.75 (0.0035)</b>                | <b>-0.52 (0.0035)</b>                                         |
| <b><i>Crybb3</i></b> | <b>crystallin, beta B3</b>                                                 | <b>68.62</b>  | <b>28.40</b>                | <b>32.69</b>                  | <b>-1.27 (0.0035)</b>              | <b>-1.07 (0.0035)</b>                | <b>0.20 (0.9992)</b>                                          |
| <i>Pde6g</i>         | phosphodiesterase 6G, cGMP-specific, rod, gamma                            | 75.52         | 28.68                       | 23.10                         | -1.40 (0.0035)                     | -1.71 (0.0035)                       | -0.31 (0.6138)                                                |
| <i>Rcvrn</i>         | recoverin                                                                  | 36.48         | 13.75                       | 10.71                         | -1.41 (0.0035)                     | -1.77 (0.0035)                       | -0.36 (0.6465)                                                |
| <i>Gngt1</i>         | guanine nucleotide binding protein (G protein), gamma transducing activity | 101.30        | 36.93                       | 33.83                         | -1.46 (0.0035)                     | -1.58 (0.0035)                       | -0.13 (0.9992)                                                |

|                     |                                   |               |               |              |                       |                       |                       |
|---------------------|-----------------------------------|---------------|---------------|--------------|-----------------------|-----------------------|-----------------------|
|                     | polypeptide 1                     |               |               |              |                       |                       |                       |
| <i>Pdc</i>          | phosducin                         | 94.75         | 34.42         | 20.81        | -1.46 (0.0035)        | -2.19 (0.0035)        | -0.73 (0.0035)        |
| <i>Nrl</i>          | neural retina leucine zipper gene | 42.36         | 15.22         | 12.02        | -1.48 (0.0035)        | -1.82 (0.0035)        | -0.34 (0.4938)        |
| <i>Prph2</i>        | peripherin 2                      | 66.08         | 22.12         | 13.17        | -1.58 (0.0035)        | -2.33 (0.0035)        | -0.75 (0.0035)        |
| <i>Rho</i>          | rhodopsin                         | 287.12        | 84.59         | 53.10        | -1.76 (0.0035)        | -2.43 (0.0035)        | -0.67 (0.0035)        |
| <i>Mbp</i>          | myelin basic protein              | 23.78         | 24.69         | 49.00        | 0.05 (0.9992)         | 1.04 (0.0035)         | 0.99 (0.0035)         |
| <i>Cryga</i>        | crystallin, gamma A               | 49.38         | 40.55         | 24.02        | -0.28 (0.9683)        | -1.04 (0.0035)        | -0.76 (0.0257)        |
| <b><i>Crygs</i></b> | <b>crystallin, gamma S</b>        | <b>168.61</b> | <b>102.88</b> | <b>79.44</b> | <b>-0.71 (0.0035)</b> | <b>-1.09 (0.0035)</b> | <b>-0.37 (0.4025)</b> |
| <i>Crygf</i>        | crystallin, gamma F               | 37.28         | 19.30         | 15.59        | -0.95 (0.0035)        | -1.26 (0.0035)        | -0.31 (0.9992)        |

<sup>1</sup>Genes shared by retinas are shown in bold type.
